# Supplementary material for: Transcriptional Reprogramming of Candida tropicalis in Response to Isoespintanol Treatment
Source: Preprints.org preprint supplement (doi:10.20944/preprints202311.0735.v1), 2023-11-13
Supplement: Supplementary file 2 [file supplementary]

*Article*

***Transcriptional Reprogramming of Candida tropicalis in Response to Isoespintanol Treatment***

**Orfa Inés Contreras Martínez1*, Alberto Angulo Ortíz2, Gilmar Santafé Patiño2, Katia Aviña-Padilla3 María Camila Velasco Pareja4 and María Fernanda Yasnot 4**

1 Biology Department, Faculty of Basic Sciences, University of Córdoba, Montería 230002, Colombia

2 Chemistry Department, Faculty of Basic Sciences, University of Córdoba, Montería 230002, Colombia

3 Center for Research and Advanced Studies of the I.P.N Unit Irapuato, Irapuato 36821, Mexico

4 Bacteriology Department, Faculty of Health Sciences, University of Córdoba, Montería 230002, Colombia

***** Correspondence: [oicontreras@correo.unicordoba.edu.co](mailto:oicontreras@correo.unicordoba.edu.co)

**Supplementary Materials**

| **Table S1.** List of real-time qPCR primers | |
| --- | --- |
| **Genes** | **Sequences** |
| *ERG6* | fwd: 5´-CAG.TCT.TGG.AAG.GTG.TCT.ACT.C-3´ |
| rev: 5´- GGT.GTT.CTT.CGT.TGG.TTT.CAT.C-3´ |
| *KRE1* | fwd: 5´-GCA.GAT.GAA.ACC.ACA.TCA.TCA.TC-3´ |
| rev: 5´-CAT.CAG.TAC.CTG.TTA.CCC.AAA.CTA-3´ |
| *CTRG_03786* | fwd: 5´- GGT.GGT.ACT.GAT.ACC.GTT.GTT -3´ |
| rev: 5´- GTG.GGT.TGG.TGT.AGG.TGA.TAG -3´ |
| *ACTIN-1* | fwd: 5´-GAC.CGA.AGC.TCC.AAT.GAA.TC-3´ |
| rev: 5´-AAT.TGG.GAC.AAC.GTG.GGT.AA-3´ |

| **Table S2.** RNA extraction of *C. tropicalis*. Quality control total RNA extracted from Zoea-type larvae of *Callinectus sapidus* | | | |
| --- | --- | --- | --- |
| **Sample Code** | **Purified RNA [ng/uL]** | **Final volume (uL)** | **Total purified RNA [ug]** |
| RNAISO | 29,51 | 27 | 0,797 |
| RNAINO | 32,701 | 24 | 0,785 |
| RNAISO: ISO treated Yeast; RNAINO: untreated yeast used as control | | | |

| **Table S3.** NGS sequencing by RNA-seq of *C. tropicalis* | | |
| --- | --- | --- |
| **Sample** | **Total reads** | **Clean reads %** |
| RNAISO | 40451606 | 94.9 |
| RNAINO | 26484468 | 97.6 |

| **Table S4.** Mapping of transcriptomes obtained by RNA-seq | | |
| --- | --- | --- |
|  | **RNAISO** | **RNAINO** |
| Number of input reads | 19832040 | 13126552 |
| Average input read length | 292 | 297 |
| Uniquely mapped reads number | 16219548 | 11109083 |
| Uniquely mapped reads % | 81.78% | 84.63% |
| Average mapped length | 288.70 | 294.30 |
